# Supplementary material for: (Z)-Selective cross-dimerization of arylacetylenes with silylacetylenes catalyzed by vinylideneruthenium complexes
Source: Royal Society of Chemistry journal article supplement (doi:10.1039/b504436g), 2005-01-01
Supplement: b504436g.pdf [file b504436g.pdf]

**Electronic Supplementary Information for:**

**(Z)-Selective cross-dimerization of arylacetylenes with silylacetylenes catalyzed by vinylideneruthenium complexes**

Hiroyuki Katayama,\* Hiroshi Yari, Masaki Tanaka, and Fumiyuki Ozawa\*

*International Research Center for Elements Science, Institute for Chemical Research, Kyoto University, Uji, Kyoto 611-0011, Japan*

(hiroyuki@scl.kyoto-u.ac.jp, ozawa@scl.kyoto-u.ac.jp)

---

**Experimental Section**

**General Procedure and Materials.** All manipulations were performed under a nitrogen atmosphere using conventional Schlenk techniques. Nitrogen gas was purified by passing successively through the columns of an activated copper catalyst (BASF, R3-11) and P<sub>2</sub>O<sub>5</sub> (Merck, SICAPENT). NMR spectra were recorded on a Varian Mercury 300 (<sup>1</sup>H NMR, 300.11 MHz; <sup>13</sup>C NMR, 75.46 MHz) spectrometer. Chemical shifts are reported in δ (ppm), referenced to the <sup>1</sup>H (of residual protons) and <sup>13</sup>C signals of deuterated solvents. Mass spectra were measured with a Shimadzu QP-5000 GC-mass spectrometer (EI, 70 eV). GLC analysis was performed on a Shimadzu GC-14B instrument equipped with a FID detector and a capillary column CBP-1 (25 m × 0.25 mm).

Dichloromethane was dried over CaH<sub>2</sub> and distilled prior to use. RuCl<sub>2</sub>(=C=CHY)L<sub>2</sub> (L = PPr<sup>*i*</sup><sub>3</sub>, Y = Ph (**1-Pr<sup>*i*</sup>**); L = PCy<sub>3</sub>, Y = Ph (**1-Cy**); L = PPh<sub>3</sub>, Y = *t*-Bu (**1-Ph**)) were prepared according to literatures.<sup>1</sup> 2-Ethynyltoluene (**2c**), 4-ethynylanisole (**2d**), 2-ethynylthiophene (**2e**), and 2-ethynylfluorene (**2f**) were synthesized by Sonogashira coupling reactions of the corresponding iodoarenes with (trimethylsilyl)acetylene followed by desilylation with K<sub>2</sub>CO<sub>3</sub> in MeOH.<sup>2</sup> All other chemicals were obtained from commercial suppliers and used without further purification.

**Homo-Dimerization of Arylacetylenes.** A typical procedure (run 2 in Table 1) was reported in ref. 3. Identification data of the following compounds were consistent with those reported: (*Z*)-1,4-diphenyl-1-buten-3-yne ((*Z*)-**5a**),<sup>4</sup> (*Z*)-1,4-di(4-tolyl)-1-buten-3-yne ((*Z*)-**5b**),<sup>5</sup> (*Z*)-1,4-di(2-tolyl)-1-buten-3-yne ((*Z*)-**5c**),<sup>5</sup> (*Z*)-1,4-bis(2-fluorenyl)-1-buten-3-yne ((*Z*)-**5f**),<sup>4</sup> 2,4-bis(trimethylsilyl)-1-buten-3-yne (*gem*-**6m**).<sup>6</sup>

**Identification Data for (*Z*)-1,4-Bis(4-methoxyphenyl)-1-buten-3-yne ((*Z*)-**5d**).** Orange oil. <sup>1</sup>H NMR (CDCl<sub>3</sub>): δ 7.92–7.87 (m, 2H, Ar), 7.45–7.41 (m, 2H, Ar), 6.93–6.86 (m, 4H, Ar), 6.60 (d, *J* = 11.9 Hz, 1H, ArCH=), 5.79 (d, *J* = 11.9 Hz, 1H, =CHC≡C), 3.84, 3.83 (each s, 6H, OMe). <sup>13</sup>C{<sup>1</sup>H} NMR (CDCl<sub>3</sub>): δ 159.6, 159.5 (each s, Ar), 137.3 (s, ArCH=), 132.8, 130.1, 114.0, 113.6 (each s, Ar), 105.1 (s, =CHC≡C), 95.4, 87.4 (each s, C≡C), 55.3, 55.2 (each s, OMe). MS, *m/z* (rel intensity, %): 264 (M<sup>+</sup>, 100), 249 (34), 234 (9), 221 (22), 206 (18), 190 (12), 178 (30), 152 (14), 132 (13), 94 (16), 76 (18), 63 (13). Anal. Calcd for C<sub>18</sub>H<sub>16</sub>O<sub>2</sub>: C, 81.79; H, 6.10. Found: C, 81.55; H, 6.23.

**(*Z*)-1,4-Bis(2-thienyl)-1-buten-3-yne ((*Z*)-**5e**).** Red oil. <sup>1</sup>H NMR (CDCl<sub>3</sub>): δ 7.38–7.33 (m, 3H, Ar), 7.29–7.27 (m, 1H, Ar), 7.06, 7.04 (each dd, *J* = 4.2, 0.9 Hz, 2H, Ar), 6.96 (dt, *J* = 11.4 Hz, 1H, ArCH=), 5.77 (d, *J* = 11.4 Hz, 1H, =CHC≡C). <sup>13</sup>C{<sup>1</sup>H} NMR (CDCl<sub>3</sub>): δ 140.8 (s, ArCH=), 132.2, 131.8, 129.7, 127.8, 127.2, 126.4, 123.5 (each s, Ar), 104.1 (s, =CHC≡C), 92.4, 92.2 (each s, C≡C). MS, *m/z* (rel intensity, %): 216 (M<sup>+</sup>, 100), 184 (21), 171 (63), 108 (14), 86 (17), 69 (20). Anal. Calcd for C<sub>12</sub>H<sub>8</sub>S<sub>2</sub>: C, 66.63; H, 3.73. Found: C, 67.03; H, 3.78.

**Cross-Dimerization between Arylacetylenes and Silylacetylenes.** A typical procedure is as follows (run 3 in Table 2). To a solution of 4-ethynyltoluene (**2a**) (116 mg, 1.00 mmol), *N*-methylpyrrolidine (17 mg, 0.20 mmol), and anisole (31 mg, internal standard for GLC analysis) in CH<sub>2</sub>Cl<sub>2</sub> (1.0 mL) were successively added (trimethylsilyl)acetylene (**3m**) (0.98 g, 10 mmol) and **1-Pr<sup>i</sup>** (30 mg, 0.050 mmol) at room temperature. The reaction mixture was stirred for 16 h. GLC analysis revealed the formation of **4am**, **5a** and **6m** in 93, 5 (based on **2a**) and 24% (based on **3m**) yields, respectively. Volatile materials were removed by pumping. The dark red oily

residue was purified by flash column chromatography over silica gel eluted with hexane. Homo-dimer **6m** was eluted first. Then the eluate containing cross-dimer **4am** was obtained. Evaporation of the eluate afforded **4am** having a (*Z*):(*E*):*gem* ratio of 93:0:7 (167 mg, 78%) as a colorless oil. Further chromatographic purification gave geometrically pure (*Z*)-**4am** (107 mg, 50%). All the reactions in Tables 2 and 3 were similarly carried out. Cross-dimerization products **4** were characterized by  $^1\text{H}$  and  $^{13}\text{C}\{^1\text{H}\}$  NMR spectroscopy, mass spectrometry and elemental analysis, except for **4an** (run 6 in Table 3), which could not be separated from **5a** and **6n** by column chromatography.

**Identification Data for (*Z*)-1-(4-Tolyl)-4-trimethylsilyl-1-buten-3-yne ((*Z*)-**4am**).**  $^1\text{H}$  NMR ( $\text{CDCl}_3$ ):  $\delta$  7.82, 7.17 (each d,  $J = 8.2$  Hz, 4H, Ar), 6.63 (d,  $J = 12.1$  Hz, 1H,  $\text{ArCH=}$ ), 5.65 (d,  $J = 12.1$  Hz, 1H,  $=\text{CHC}\equiv\text{C}$ ), 2.37 (s, 3H, Me), 0.26 (s, 9H,  $\text{SiMe}_3$ ).  $^{13}\text{C}\{^1\text{H}\}$  NMR ( $\text{CDCl}_3$ ):  $\delta$  139.8 (s,  $\text{ArCH=}$ ), 138.7, 133.7, 128.8 (each s, Ar), 106.1 (s,  $=\text{CHC}\equiv\text{C}$ ), 104.0, 101.9 (each s,  $\text{C}\equiv\text{C}$ ), 21.4 (s, Me),  $-0.2$  (s,  $\text{SiMe}_3$ ). MS,  $m/z$  (relative intensity, %): 214 ( $\text{M}^+$ , 51), 199 (100), 183 (37), 167 (14), 155 (14), 141 (9), 115 (10), 99 (25), 73 (9), 59 (10). Anal. Calcd for  $\text{C}_{14}\text{H}_{18}\text{Si}$ : C, 78.44; H, 8.46. Found: C, 78.09; H, 8.38.

**(*Z*)-1-Phenyl-4-trimethylsilyl-1-buten-3-yne ((*Z*)-**4bm**).**  $^1\text{H}$  NMR ( $\text{CDCl}_3$ ):  $\delta$  7.92–7.89 (m, 2H, Ph), 7.36–7.30 (m, 3H, Ph), 6.66 (d,  $J = 12.0$  Hz, 1H,  $\text{PhCH=}$ ), 5.71 (d,  $J = 12.0$  Hz, 1H,  $=\text{CHC}\equiv\text{C}$ ), 0.22 (s, 9H,  $\text{SiMe}_3$ ).  $^{13}\text{C}\{^1\text{H}\}$  NMR ( $\text{CDCl}_3$ ):  $\delta$  139.8 (s,  $\text{PhCH=}$ ), 136.8, 128.8, 128.6, 128.1 (each s, Ph), 107.2 (s,  $=\text{CHC}\equiv\text{C}$ ), 103.7, 102.2 (each s,  $\text{C}\equiv\text{C}$ ),  $-0.3$  (s,  $\text{SiMe}_3$ ). MS,  $m/z$  (relative intensity, %): 200 ( $\text{M}^+$ , 39), 185 (100), 169 (17), 155 (14), 141 (10), 129 (10), 115 (10), 92 (10), 77 (7), 53 (27). Anal. Calcd for  $\text{C}_{13}\text{H}_{16}\text{Si}$ : C, 77.93; H, 8.05. Found: C, 77.81; H, 8.09.

**(*Z*)-1-(2-Tolyl)-4-trimethylsilyl-1-buten-3-yne ((*Z*)-**4cm**).**  $^1\text{H}$  NMR ( $\text{CDCl}_3$ ):  $\delta$  8.30–8.26 (m, 1H, Ar), 7.23–7.16 (m, 3H, Ar), 6.88 (d,  $J = 12.1$  Hz, 1H,  $\text{ArCH=}$ ), 5.76 (d,  $J = 12.1$  Hz, 1H,  $=\text{CHC}\equiv\text{C}$ ), 2.34 (s, 3H, Me), 0.21 (s, 9H,  $\text{SiMe}_3$ ).  $^{13}\text{C}\{^1\text{H}\}$  NMR ( $\text{CDCl}_3$ ):  $\delta$  137.8 (s,  $\text{ArCH=}$ ), 136.5, 134.8, 130.0, 128.5, 128.1, 125.3 (each s, Ar), 107.9 (s,  $=\text{CHC}\equiv\text{C}$ ), 103.5, 101.0

(each s, C≡C), 19.8 (s, Me), -0.3 (s, SiMe<sub>3</sub>). MS, *m/z* (relative intensity, %): 214 (M<sup>+</sup>, 69), 199 (96), 183 (98), 171 (29), 155 (46), 141 (46), 115 (24), 99 (36), 86 (15), 73 (100), 59 (27). Anal. Calcd for C<sub>14</sub>H<sub>18</sub>Si: C, 78.44; H, 8.46. Found: C, 78.33; H, 8.37.

**(Z)-1-(4-Methoxyphenyl)-4-trimethylsilyl-1-buten-3-yne ((Z)-4dm).** <sup>1</sup>H NMR (CDCl<sub>3</sub>): δ 7.89–7.87 (m, 2H, Ar), 6.90–6.86 (m, 2H, Ar), 6.59 (d, *J* = 12.1 Hz, 1H, ArCH=), 5.59 (d, *J* = 12.1 Hz, 1H, =CHC≡C), 3.84 (s, 3H, OMe), 0.26 (s, 9H, SiMe<sub>3</sub>). <sup>13</sup>C{<sup>1</sup>H} NMR (CDCl<sub>3</sub>): δ 159.8 (s, Ar), 139.4 (s, PhCH=), 130.3, 129.4, 113.4 (each s, Ph), 104.7 (s, =CHC≡C), 104.2, 101.4 (each s, C≡C), 55.3 (s, OMe), -0.2 (s, SiMe<sub>3</sub>). MS, *m/z* (relative intensity, %): 230 (M<sup>+</sup> 81), 215 (100), 200 (5), 185 (30), 169 (12), 155 (14), 141 (25), 128 (9), 115 (16), 107 (36), 86 (9), 73 (28), 59 (18). Anal. Calcd for C<sub>14</sub>H<sub>18</sub>OSi: C, 72.99; H, 7.88. Found: C, 72.70; H, 7.87.

**(Z)-1-(2-Thienyl)-4-trimethylsilyl-1-buten-3-yne ((Z)-4em).** <sup>1</sup>H NMR (CDCl<sub>3</sub>): δ 7.34 (d, *J* = 5.0 Hz, 1H, Ar), 7.30 (d, *J* = 3.7 Hz, 1H, Ar), 7.03 (dd, *J* = 5.0, 3.7 Hz, 1H, Ar), 6.90 (d, *J* = 11.0 Hz, 1H, ArCH=), 5.56 (d, *J* = 11.0 Hz, 1H, =CHC≡C), 0.29 (s, 9H, SiMe<sub>3</sub>). <sup>13</sup>C{<sup>1</sup>H} NMR (CDCl<sub>3</sub>): δ 140.7 (s, ArCH=), 133.3, 129.8, 127.0, 126.3 (each s, Ar), 105.2 (s, =CHC≡C), 104.5, 103.6 (each s, C≡C), 0.3 (s, SiMe<sub>3</sub>). MS, *m/z* (relative intensity, %): 206 (M<sup>+</sup>, 53), 191 (100), 165 (14), 147 (13), 115 (27), 95 (18), 75 (14). Anal. Calcd for C<sub>11</sub>H<sub>14</sub>SSi: C, 64.02; H, 6.84. Found: C, 63.78; H, 6.97.

**(Z)-1-(2-Fluorenyl)-4-trimethylsilyl-1-buten-3-yne ((Z)-4fm).** <sup>1</sup>H NMR (CDCl<sub>3</sub>): δ 8.33 (br s, 1H, Ar), 7.84–7.75 (m, 3H, Ar), 7.59–7.55 (m, 1H, Ar), 7.43–7.31 (m, 2H, Ar), 6.75 (d, *J* = 11.9 Hz, 1H, ArCH=), 5.73 (d, *J* = 11.9 Hz, 1H, =CHC≡C), 3.92 (s, 2H, CH<sub>2</sub>), 0.33 (s, 9H, SiMe<sub>3</sub>). <sup>13</sup>C{<sup>1</sup>H} NMR (CDCl<sub>3</sub>): δ 143.8, 143.1, 142.2, 141.3 (each s, Ar), 140.2 (s, ArCH=), 135.1, 128.3, 127.0, 126.8, 125.0, 124.9, 120.1, 119.5 (each s, Ar), 106.3 (s, =CHC≡C), 104.3, 102.3 (each s, C≡C), 36.8 (s, CH<sub>2</sub>), -0.2 (s, SiMe<sub>3</sub>). MS, *m/z* (relative intensity, %): 288 (M<sup>+</sup> 100), 273 (54), 257 (23), 245 (25), 229 (15), 215 (40), 136 (85), 121 (14), 108 (9), 73 (26), 59 (12). Anal. Calcd for C<sub>20</sub>H<sub>20</sub>Si: C, 83.28; H, 6.99. Found: C, 83.44; H, 7.09.

**(Z)-1-(4-Tolyl)-4-dimethylphenylsilyl-1-buten-3-yne ((Z)-4an).**  $^1\text{H}$  NMR ( $\text{CDCl}_3$ ):  $\delta$  7.81 (d,  $J = 8.2$  Hz, 2H,  $\text{C}_6\text{H}_4$ ), 7.72–7.67 (m, 2H, SiPh), 7.44–7.38 (m, 3H, SiPh), 7.12 (d,  $J = 8.2$  Hz, 2H,  $\text{C}_6\text{H}_4$ ), 6.66 (d,  $J = 12.1$  Hz, 1H, ArCH=), 5.70 (d,  $J = 12.1$  Hz, 1H, =CHC $\equiv$ C), 2.36 (s, 3H,  $\text{MeC}_6\text{H}_4$ ), 0.51 (s, 6H, SiMe $_2$ ). MS,  $m/z$  (relative intensity, %):  $m/z$  276 ( $\text{M}^+$ , 38), 261 (100), 245 (7), 215 (14), 183 (25), 159 (36), 130 (26), 105 (20), 91 (9), 77 (7).

**(Z)-1-(4-Tolyl)-4-triisopropylsilyl-1-buten-3-yne ((Z)-4ao).**  $^1\text{H}$  NMR ( $\text{CDCl}_3$ ):  $\delta$  7.88 (d,  $J = 8.1$  Hz, 2H,  $\text{C}_6\text{H}_4$ ), 7.14 (d,  $J = 8.1$  Hz, 2H,  $\text{C}_6\text{H}_4$ ), 6.60 (d,  $J = 12.1$  Hz, 1H, ArCH=), 5.70 (d,  $J = 12.1$  Hz, 1H, =CHC $\equiv$ C), 2.36 (s, 3H, Me), 1.14 (apparent s, 21H, CH(CH $_3$ ) $_2$ ).  $^{13}\text{C}\{^1\text{H}\}$  NMR ( $\text{CDCl}_3$ ):  $\delta$  139.1 (s, ArCH=), 138.6, 133.8, 128.8 (each s, Ar), 106.5 (s, =CHC $\equiv$ C), 105.5, 98.8 (each s, C $\equiv$ C), 21.4 (s, Me), 18.7 (s, CH(CH $_3$ ) $_2$ ), 11.4 (s, CH(CH $_3$ ) $_2$ ). MS,  $m/z$  (relative intensity, %): 298 ( $\text{M}^+$ , 19), 255 (67), 199 (53), 185 (73), 171 (37), 159 (21), 141 (13), 115 (9), 99 (84), 92 (42), 73 (24), 59 (100). Anal. Calcd for  $\text{C}_{20}\text{H}_{30}\text{Si}$ : C, 80.46; H, 10.13. Found: C, 80.19; H, 10.25.

**Desilylation of (Z)-4am–fm.** A typical procedure is as follows. To a solution of (Z)-4am (61 mg, 0.28 mmol) in MeOH (2.8 mL) was added  $\text{K}_2\text{CO}_3$  (46 mg, 0.33 mmol). The mixture was stirred for 1 h and then quenched with water (*ca.* 2 mL). The mixture was extracted with ether (2 mL $\times$ 3), and the combined organic layers were dried over anhydrous  $\text{MgSO}_4$ . After the drying agent was filtered off, the solution was concentrated to dryness to give a brown oil. The crude product was purified by silica gel column chromatography using hexane as an eluent to afford a yellow oil of (Z)-1-(4-tolyl)-1-buten-3-yne (38 mg, 96%). Desilylations of (Z)-4bm–fm were similarly carried out. Identification data of the following compounds were consistent with those reported: (Z)-1-phenyl-1-buten-3-yne,<sup>7</sup> (Z)-1-(4-methoxyphenyl)-1-buten-3-yne,<sup>7</sup> (Z)-1-(2-thienyl)-1-buten-3-yne.<sup>8</sup>

**(Z)-1-(4-Tolyl)-1-buten-3-yne.**  $^1\text{H}$  NMR ( $\text{CDCl}_3$ ):  $\delta$  7.77, 7.17 (each d,  $J = 7.9$  Hz, 4H, Ar), 6.68 (d,  $J = 12.1$  Hz, 1H, ArCH=), 5.62 (dd,  $J = 12.1, 2.7$  Hz, 1H, =CHC $\equiv$ C), 3.34 (d,  $J = 2.7$  Hz, 1H, C $\equiv$ CH), 2.36 (s, 3H, Me).  $^{13}\text{C}\{^1\text{H}\}$  NMR ( $\text{CDCl}_3$ ):  $\delta$  140.5 (s, ArCH=), 138.8, 133.4,

129.0, 128.7 (each s, Ar), 105.2 (s, =CHC≡C), 83.2, 82.2 (each s, C≡C), 21.4 (s, Me). MS, *m/z* (relative intensity, %): 141 ( $M^+-1$ , 100), 115 (44), 70 (15), 58 (14), 51 (12). Anal. Calcd for  $C_{11}H_{10}$ : C, 92.91; H, 7.09. Found: C, 92.83; H, 7.09.

**(Z)-1-(2-Tolyl)-1-buten-3-yne.** Pale yellow oil (93% yield).  $^1H$  NMR ( $CDCl_3$ ):  $\delta$  8.13–8.10 (m, 1H, Ar), 7.23–7.19 (m, 3H, Ar), 6.94 (d,  $J = 12.1$  Hz, 1H, ArCH=), 5.74 (dd,  $J = 12.1, 2.7$  Hz, 1H, =CHC≡C), 3.17 (d,  $J = 2.7$  Hz, 1H, C≡CH), 2.33 (s, 3H, Me).  $^{13}C\{^1H\}$  NMR ( $CDCl_3$ ): 139.0 (s, ArCH=), 136.4, 130.1, 128.6, 128.0, 125.6 (each s, Ar), 107.3 (s, =CHC≡C), 82.8 (s, C≡C), 19.8 (s, Me). MS, *m/z* (relative intensity, %): 141 ( $M^+-1$ , 100), 115 (45), 70 (20), 58 (14), 51 (12). Anal. Calcd for  $C_{11}H_{10}$ : C, 92.91; H, 7.09. Found: C, 92.62; H, 7.17.

**(Z)-1-(2-Fluorenyl)-1-buten-3-yne.** Pale yellow solid (96% yield).  $^1H$  NMR ( $CDCl_3$ ):  $\delta$  8.13 (br s, 1H, Ar), 7.92–7.76 (m, 3H, Ar), 7.58–7.54 (m, 1H, Ar), 7.43–7.31 (m, 2H, Ar), 6.80 (dd,  $J = 12.1, 0.6$  Hz, 1H, ArCH=), 5.70 (dd,  $J = 12.1, 2.7$  Hz, 1H, =CHC≡C), 3.93 (s, 2H,  $CH_2$ ), 3.44 (dd,  $J = 2.7, 0.6$  Hz, C≡CH).  $^{13}C\{^1H\}$  NMR ( $CDCl_3$ ):  $\delta$  143.8, 143.2, 142.3, 141.2 (each s, Ar), 140.9 (s, ArCH=), 134.7, 127.9, 127.0, 126.8, 125.1, 125.1, 120.1, 119.7 (each s, Ar), 105.4 (s, =CHC≡C), 84.3, 82.4 (each s, C≡C), 36.9 (s,  $CH_2$ ). MS, *m/z* (relative intensity, %): 215 ( $M^+-1$ , 100), 189 (7), 163 (6), 107 (37), 94 (43). Anal. Calcd for  $C_{17}H_{12}$ : C, 94.41; H, 5.59. Found: C, 94.22; H, 5.60.

## References

- (1) (a) Katayama, H.; Ozawa, F. *Organometallics* **1998**, *17*, 5190. (b) Wakatsuki, Y.; Koga, N.; Yamazaki, H.; Morokuma, K. *J. Am. Chem. Soc.* **1994**, *116*, 8105.
- (2) Takahashi, S.; Kuroyama, Y.; Sonogashira, K.; Hagihara, N. *Synthesis* **1980**, 627.
- (3) Katayama, H.; Nakayama, M.; Nakano, T.; Wada, C.; Akamatsu, K.; Ozawa, F. *Macromolecules* **2004**, *37*, 13.
- (4) Echavarren, A. M.; López, J.; Santos, A.; Montoya, J. *J. Organomet. Chem.* **1991**, *414*, 393.
- (5) Ohmura, T.; Yorozuya, S.-i.; Yamamoto, Y.; Miyaura, N. *Organometallics*, **2000**, *19*, 365.
- (6) Yi, C. S.; Liu, N. *Organometallics* **1996**, *15*, 3968.
- (7) Gibson, A. W.; Humphrey, G. R.; Kennedy, D. J.; Wright, S. H. B. *Synthesis* **1991**, 414.
- (8) Fossatelli, M.; van der Kerk, A. C. T. H. M.; Vasilevsky, S. F.; Brandsma, L. *Tetrahedron Lett.* **1992**, *33*, 4229.

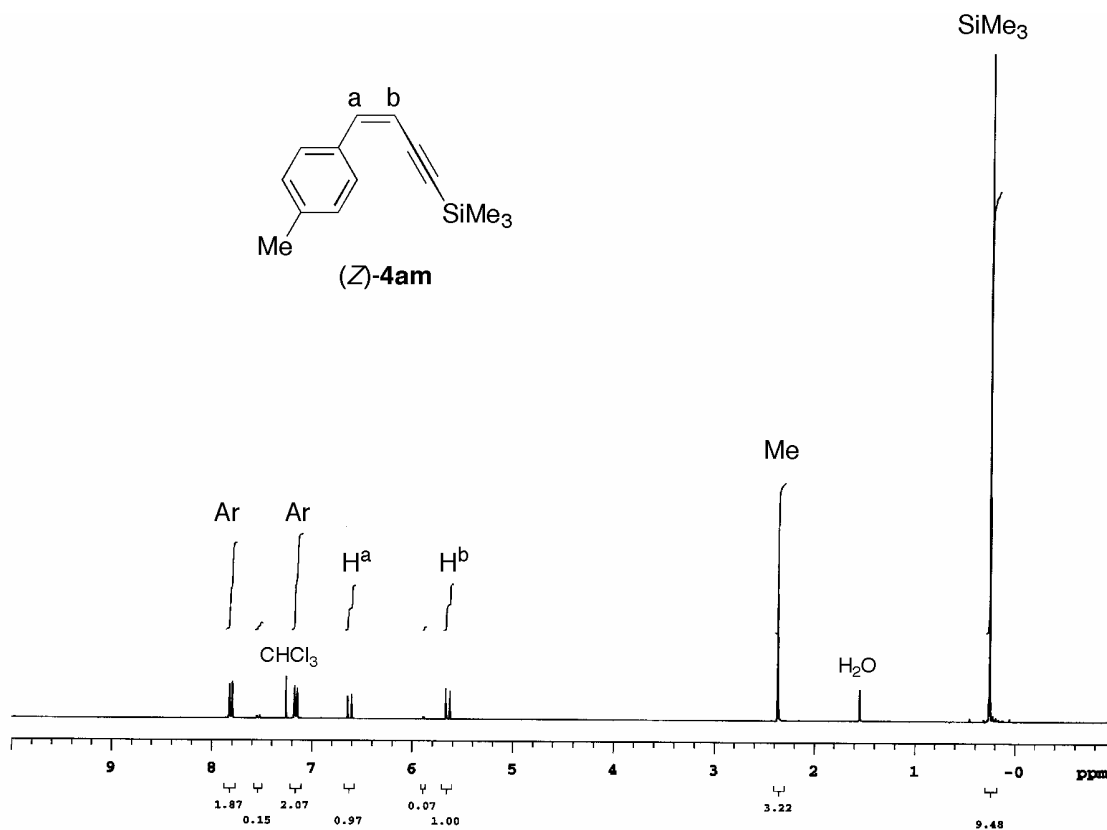

**Figure S1.** <sup>1</sup>H NMR spectrum of **4am** ((Z):(E):gem = 93:0:7) in CDCl<sub>3</sub> (300 MHz).



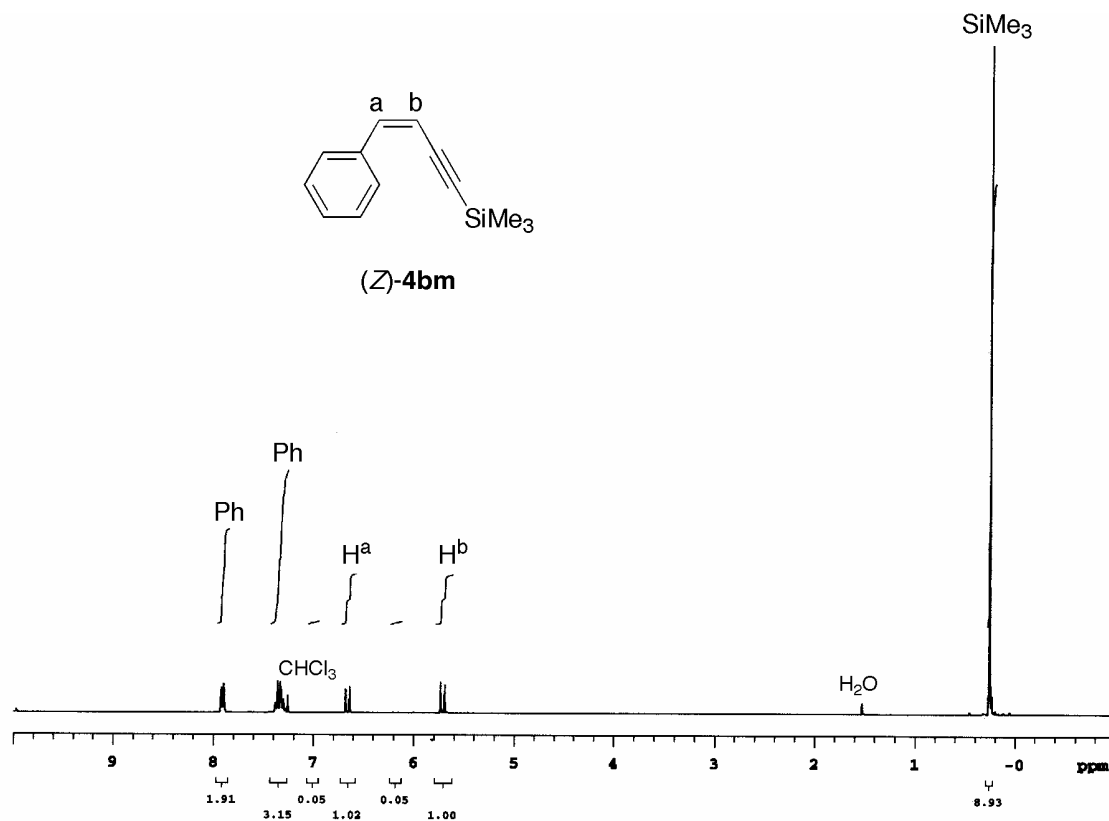

**Figure S2.** <sup>1</sup>H NMR spectrum of **4bm** ((Z):(E):gem = 95:5:0) in CDCl<sub>3</sub> (300 MHz).

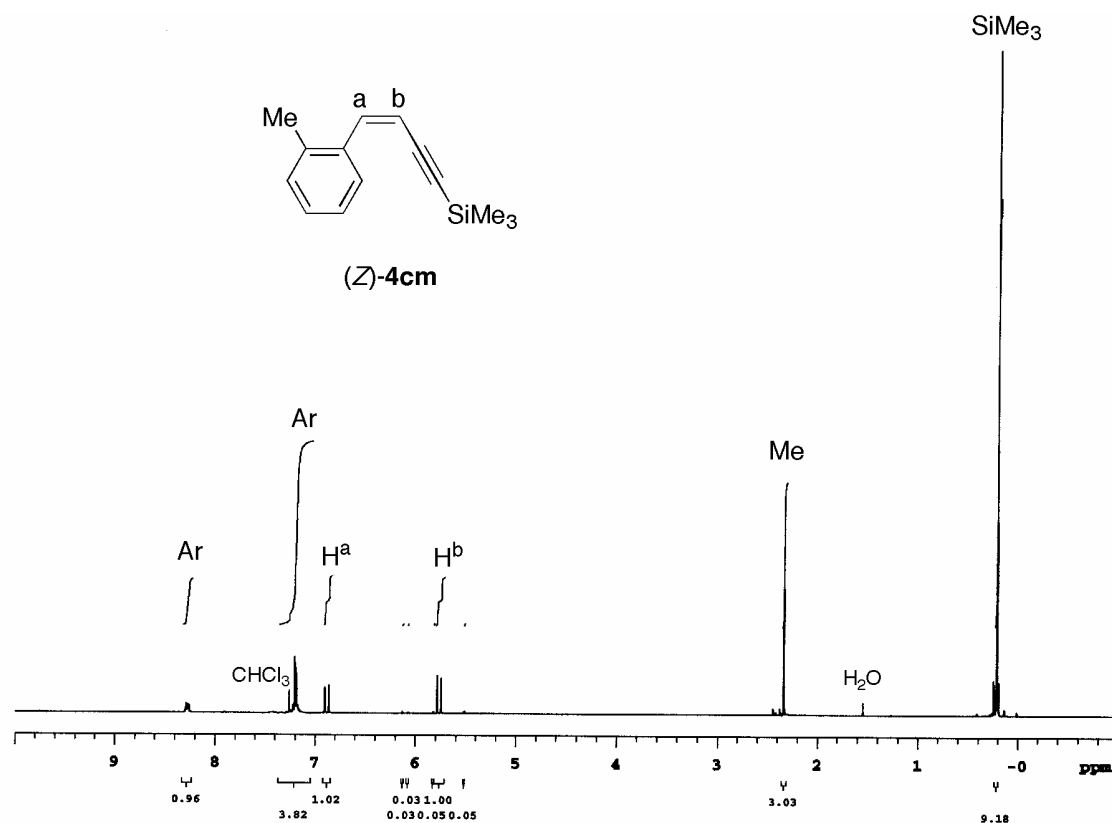

Figure S3.  $^1H$  NMR spectrum of **4cm** ((Z):(E):gem = 90:5:5) in  $CDCl_3$  (300 MHz).

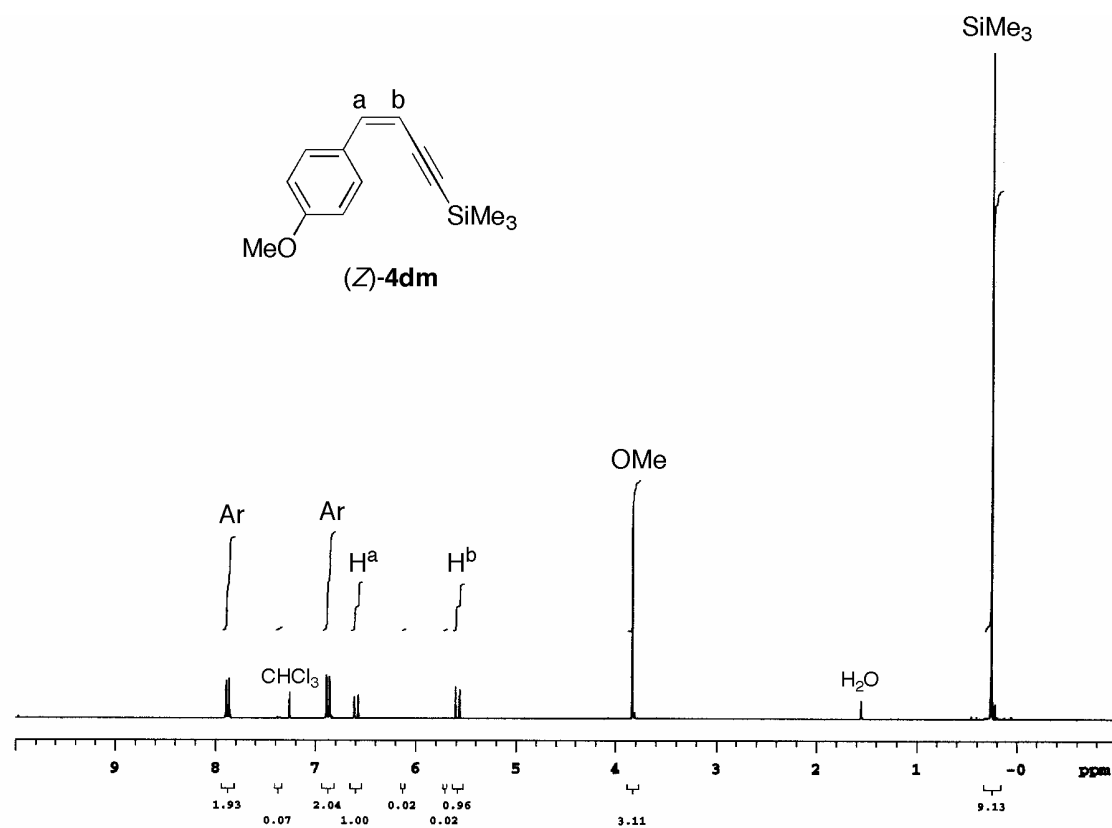

**Figure S4.** <sup>1</sup>H NMR spectrum of **4dm** ((Z):(E):gem = 98:0:2) in CDCl<sub>3</sub> (300 MHz).

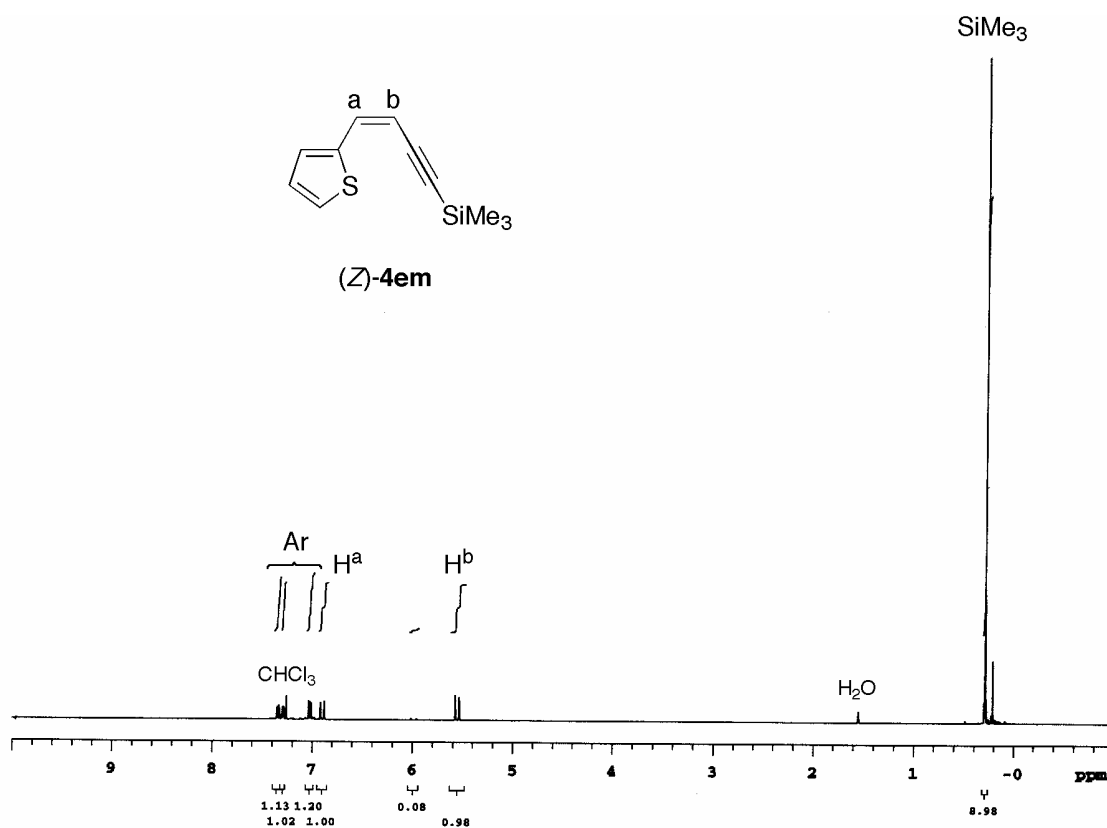

Figure S5.  $^1H$  NMR spectrum of **4em** ((Z):(E):gem = 93:7:0) in  $CDCl_3$  (300 MHz).

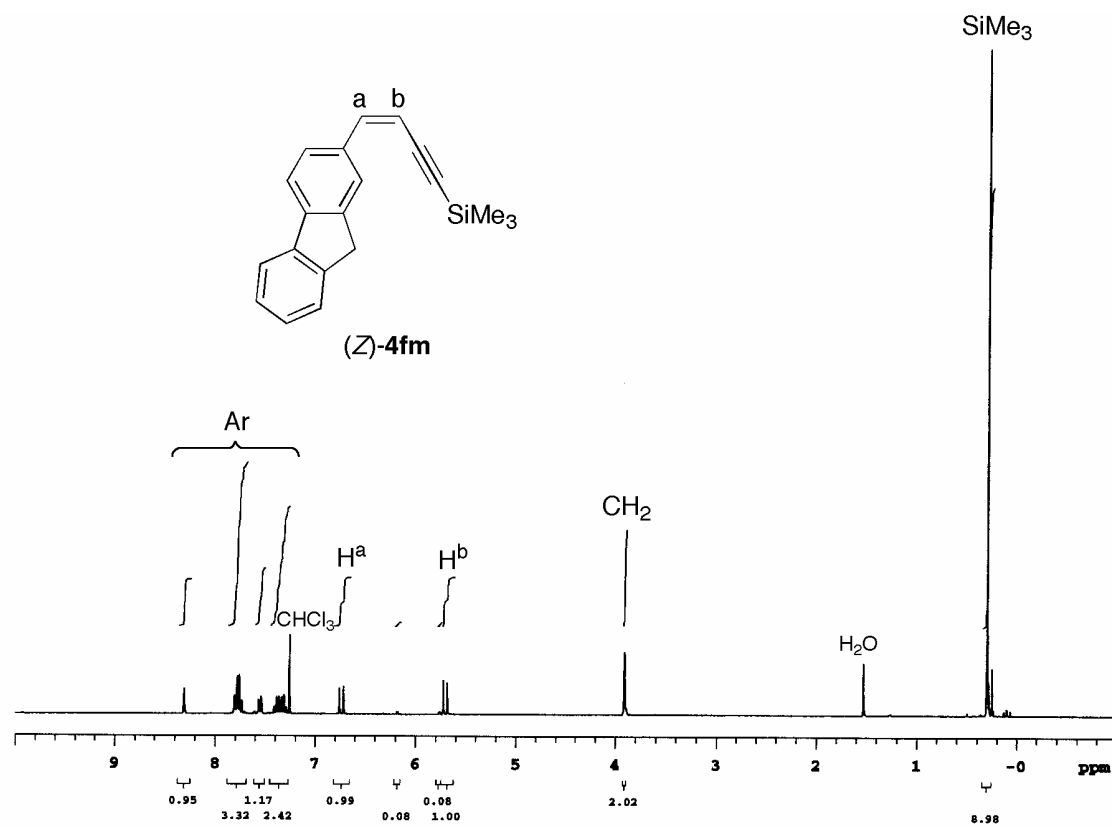

Figure S6. <sup>1</sup>H NMR spectrum of **4fm** ((Z):(E):gem = 93:0:7) in CDCl<sub>3</sub> (300 MHz).

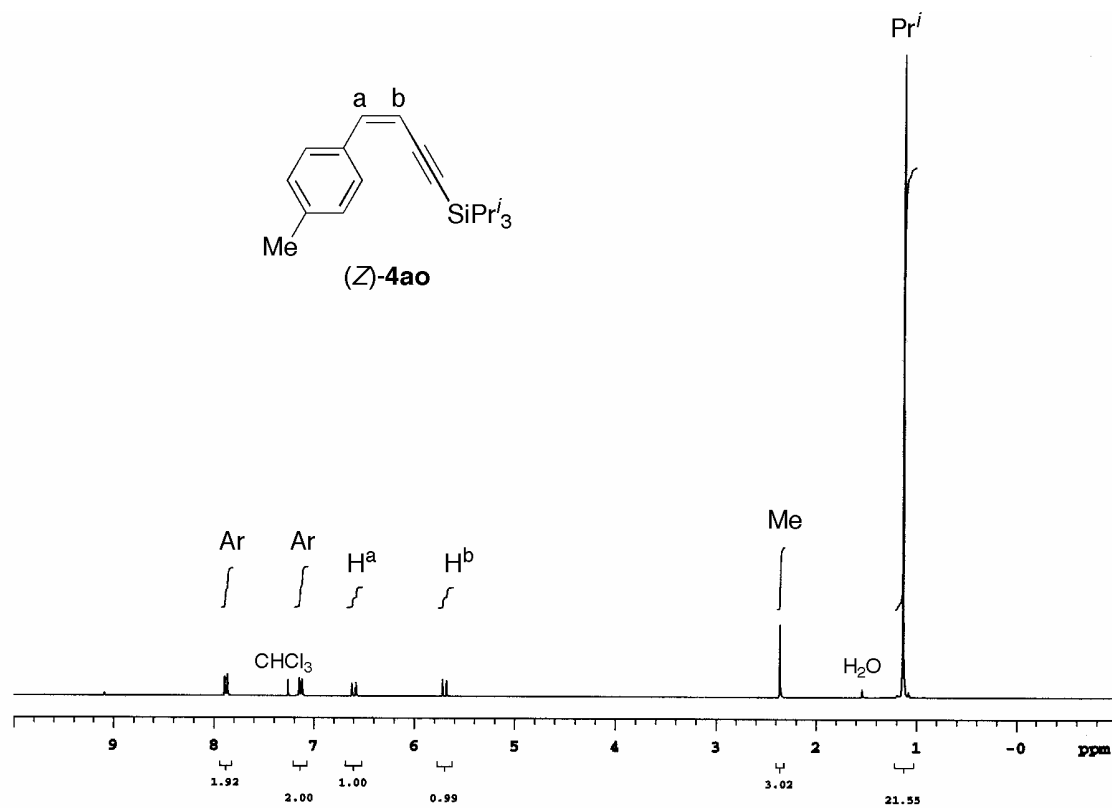

**Figure S7.** <sup>1</sup>H NMR spectrum of **4ao** ((Z):(E):gem = 100:0:0) in CDCl<sub>3</sub> (300 MHz).
